# Supplementary material for: Vimar Is a Novel Regulator of Mitochondrial Fission through Miro
Source: PubMed Central journal article supplement (PMC5065127; doi:10.1371/journal.pgen.1006359), 2016-10-07
Supplement: pgen.1006359.s002.pdf [file pgen.1006359.s002.pdf]

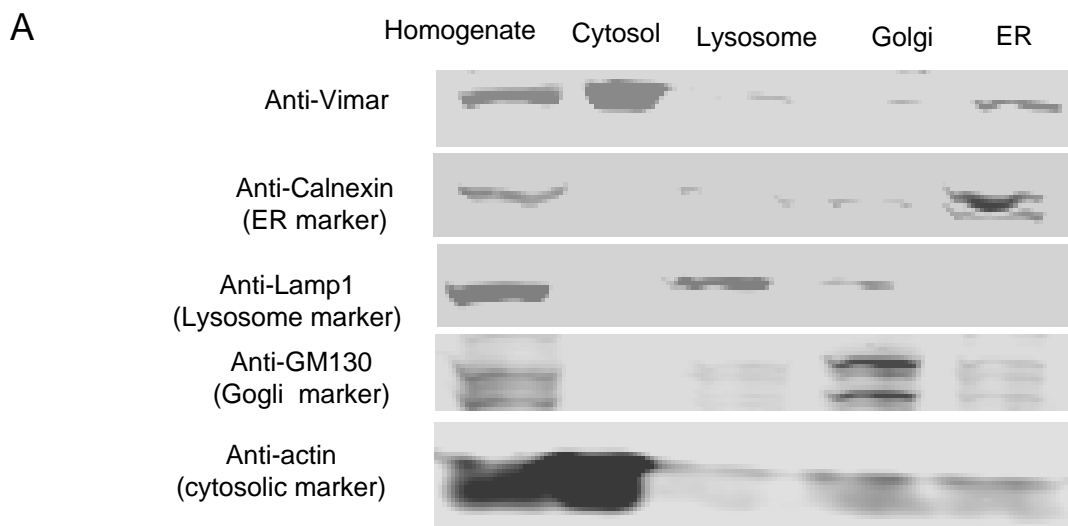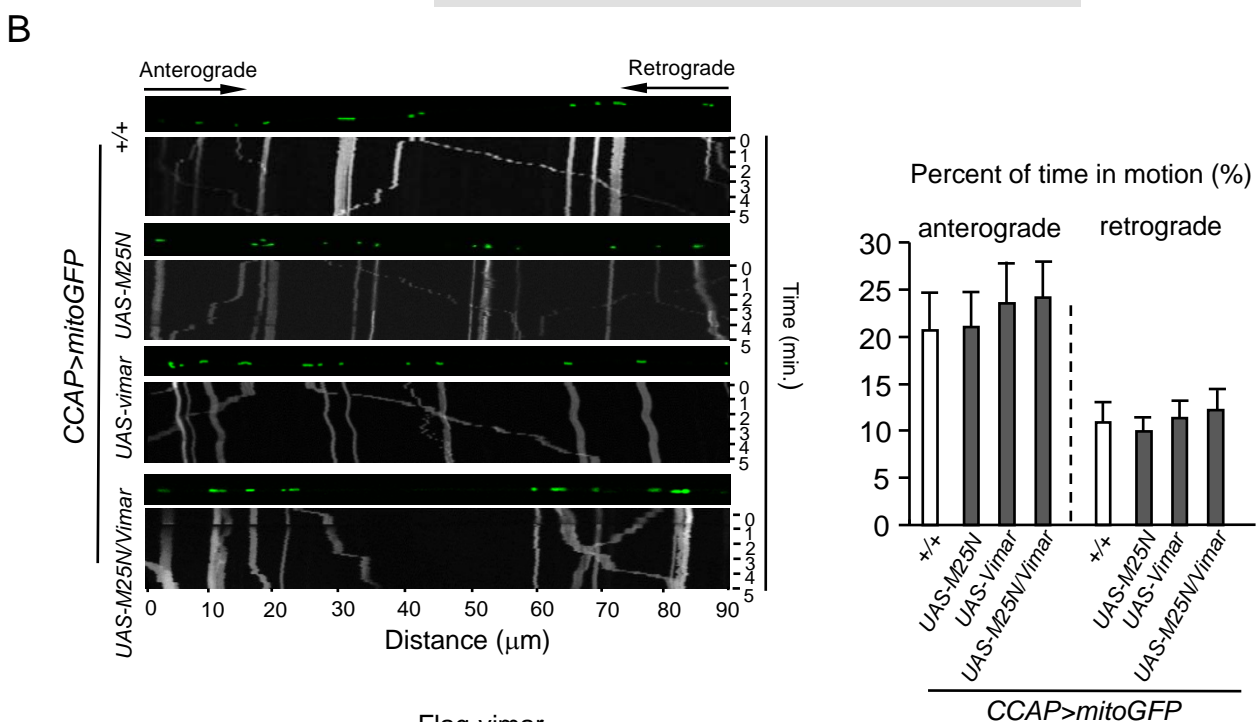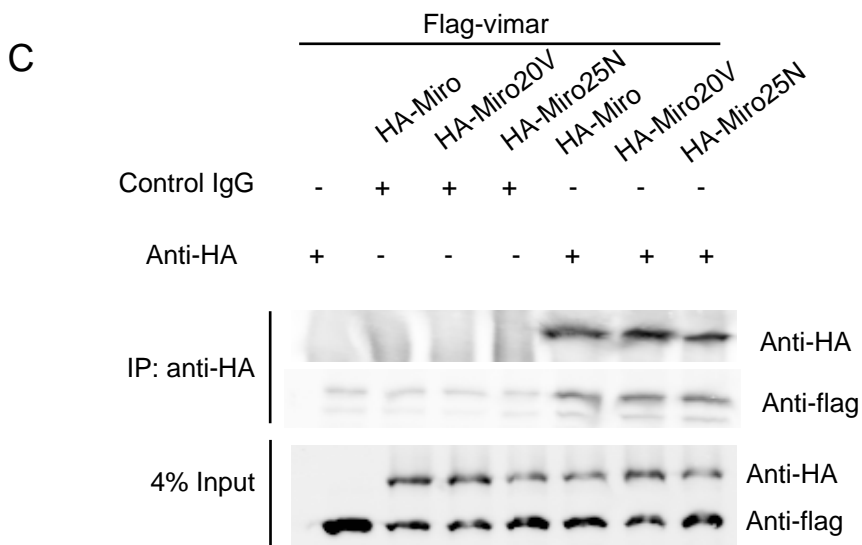

Supplementary Figure 2
