# Supplementary material for: Vimar Is a Novel Regulator of Mitochondrial Fission through Miro
Source: PubMed Central journal article supplement (PMC5065127; doi:10.1371/journal.pgen.1006359), 2016-10-07
Supplement: pgen.1006359.s006.pdf [file pgen.1006359.s006.pdf]

vimar — MATAEIDDLIEKLTTSVSPANTNL-----LCEISATKDPKLFDKHELAECFLG  
 RAP1GDS1 — -MADNLSDTLKKLKITAVDK-TEDSLEGCLDCLLQALAQNNT-ETSEKIQASGILQLFAS  
 : : : \* : : \* \* \* \* \* : \* . . \* \* : : : : : : : : : \* .  
 LTKCDDTNVRKEAAKICIAEITKSEVQRKKFKTRNI IAAFLECLRQVPTSDGSMELPIQIC  
 LLT-PQSSCKAKVANI IAEVAKNEFMRIPCVDAGLISPLVQLL-----NSKDQEVLLQTG  
 \* . : : . : : \* : \* \* \* : \* . \* . . . : \* : : : \* . . . \* : : \*  
 RALGNICYLNDEARDLILE-LEGDAVLLRLLDITTIEDVANAAQFIKVRGGLLSNYLLGG  
 RALGNICYDSHEGRSAVD-QAGGAQIVIDHLRSLCSITDPANEKLLTVFCGMLMNYSNEN  
 \* \* \* \* \* \* \* . . \* . \* : \* : : \* . : : : \* \* : \* \* \* .  
 EGLAKRAMELGVMKKLQGI IDIGASNVEQHEDLLLNTLPLLSILTENVSDLNFDSSLNQ  
 DSLQAQLINMGVIPTLVKLLGIHCQN-AALTEMCLVAFGNLAEL-ESSKEQFASTNIAEE  
 : . \* : : : \* \* : \* : : \* . . \* : : \* : : \* \* \* . : : : : :  
 LSRILAASTNPDLAEMCLELLHYQAESEVKLILAKDGLCETIYNLLEKYKTLASTSEAR  
 LVKLFKKQIEHDKREMIFEVLAPLAENDA IKLQVVEAGLVECLLEIVQQKVDSDKEDDIT  
 \* : : : . : \* \* \* : \* \* \* \* : \* \* \* : \* \* \* : : : : : . : :  
 ALMKLACELIVLILTGDSDMHYLY---TPLLKNMVDWLDSTIDLLTTGVLALGNFART  
 EL-KTGSOLMVLVLLGDESMQKLFEGGKGSVFORVLSWIPSNHQLQLAGALAIANFARN  
 \* \* . . : \* \* \* \* \* \* \* : \* . . : : : : : \* : \* : \* : \* . \* \* : \* \* \* .  
 DSHCIYFVEQQT MNKLEVLAKNNGVKDDVRLQHALLSALRNLVIPKPNKNAVIQAGLVQ  
 DANC IHMVDNGIVEKLMDDLDRHVE-DGNVTVQHAALSALRNLAIPVINKAKMLSAGVTE  
 \* : : \* \* \* : : : \* \* \* : : \* . . : \* \* \* \* \* \* \* \* \* \* \* \* : : \* \* : :  
 TILPMLIEHQPPVVFKLLGTLRMTVDGQEKLALELLKNKTLIEQLVHWSKSSDYAGVTGE  
 AVLKFLKSEMPVQFKLLGTLRMLIDAQAEAAEQLGKNVKLVERLVEWCEAKDHAGVMGE  
 : : \* : \* : . \* \* \* \* \* \* \* \* \* \* \* \* : \* \* : \* \* \* \* \* \* \* \* : : \* : \* \* \* \* \*  
 SLRLMAWL IKHAYLSKIAYALPRKGDAPAEQIADKIPLTQDYDRSSLSEFLANEGTVEAM  
 SNRLLSALIRHS-----KSKDVIKTIVQSGGIKHL  
 \* \* \* : \* \* \* : . . . : : : \* : : :  
 VSMLTAQHLVMQNEALIALCILSVVYLSQPSEAAQ---A---QLLQDELVKCEVGKKL  
 VTMATSEHVIMQNEALVALALIAALELGTAEKDLES AKLVQILHRLADERSAPEIKYNS  
 \* : \* \* \* : \* \* \* \* \* \* \* \* \* : : : \* . . . : . : \* \* \* \* \* : :  
 AELISK---SSDTMTKEIVE-NLQNCVNLLKSSEQLVAHLEQHNINELLKSIPILTEYCTL  
 MVLICALMGSECLHKEVQDLAFLDV-----VSKLRSHENKSVAAQASLTEQRLTVES---  
 \* \* . \* : : \* \* : : : : . : \* \* : : : : \* \* .

Supplementary Figure 6
